# Supplementary material
Source: publisher site journal article supplement (https://www.dovepress.com/article/256866)
Supplement: Supplementary file 1 [file get_supplementary_file.php]

Supplemental Table 1 Baseline demographics in the cohorts before matching

| **Measures** | **Aerobika N=662** | **Acapella N=4,367** | **Absolute standardized difference (%)** |
| --- | --- | --- | --- |
| Age (years), mean (SD), n (%) | 72.5 (11.0) | 71.8 (11.3) | 5.5 |
| 18-34 | 3 (0.5) | 24 (0.5) | 4.6 |
| 35-50 | 17 (2.6) | 127 (2.9) |  |
| 51-64 | 139 (21.0) | 957 (21.9) |  |
| 65-74 | 187 (28.2) | 1,266 (29.0) |  |
| 75+ | 316 (47.7) | 1,993 (45.6) |  |
| Sex, n (%) |  |  |  |
| Female | 371 (56.0) | 2,154 (49.3) | 13.5 |
| Male | 291 (44.0) | 2,213 (50.7) |  |
| Geographic region, n (%) |  |  |  |
| Midwest | 370 (55.9) | 1,339 (30.7) | 68.7 |
| South | 154 (23.3) | 2,262 (51.8) |  |
| Northeast | 87 (13.1) | 281 (6.4) |  |
| West | 51 (7.7) | 485 (11.1) |  |
| Payer type, n (%) |  |  |  |
| Medicarea | 492 (74.3) | 3,177 (72.8) | 6.2 |
| Third partyb | 122 (18.4) | 890 (20.4) |  |
| Cash or Other/unknown | 31 (4.7) | 213 (4.9) |  |
| Medicaid | 17 (2.6) | 87 (2.0) |  |
| Index year, n (%) |  |  |  |
| 2013 | 25 (3.8) | 218 (5.0) | 23.0 |
| 2014 | 105 (15.9) | 771 (17.7) |  |
| 2015 | 96 (14.5) | 910 (20.8) |  |
| 2016 | 138 (20.8) | 903 (20.7) |  |
| 2017 | 222 (33.5) | 1,103 (25.3) |  |
| 2018 | 76 (11.5) | 462 (10.6) |  |

**Notes:**

aMedicare includes Part D coverage

bThird party payers include commercial payers, employers, and governmental payers

**Abbreviations:** SD: standard deviation

**Supplemental Table 2** Baseline clinical characteristics and HRU in the cohorts before matching

| **Measures** | **Aerobika N=662** | **Acapella N=4,367** | **Absolute standardized difference (%)** |
| --- | --- | --- | --- |
| CCI, mean (SD) | 3.7 (2.7) | 3.8 (2.7) | 3.0 |
| Comorbid conditions, n (%) |  |  |  |
| Hyperlipidemia | 371 (56.0) | 2,454 (56.2) | 0.3 |
| Cardiovascular disease | 295 (44.6) | 1,795 (41.1) | 7.0 |
| Anxiety/depression | 243 (36.7) | 1,360 (31.1) | 11.8 |
| Diabetes | 224 (33.8) | 1,528 (35.0) | 2.4 |
| Malignancy | 151 (22.8) | 1,070 (24.5) | 4.0 |
| Stroke or TIA | 132 (19.9) | 957 (21.9) | 4.9 |
| Emphysema | 127 (19.2) | 931 (21.3) | 5.3 |
| Hypothyroidism | 104 (15.7) | 765 (17.5) | 4.9 |
| Acute respiratory tract infections | 79 (11.9) | 660 (15.1) | 9.3 |
| Bronchiectasis | 26 (3.9) | 163 (3.7) | 1.0 |
| Treatment history, n (%) |  |  |  |
| Maintenance medicationsa |  |  |  |
| ICS/LABA | 205 (31.0) | 1,313 (30.1) | 2.0 |
| LAMA | 185 (27.9) | 1,263 (28.9) | 2.2 |
| LABA | 43 (6.5) | 158 (3.6) | 13.2 |
| LAMA/LABA | 32 (4.8) | 115 (2.6) | 11.6 |
| Xanthines | 34 (5.1) | 114 (2.6) | 13.1 |
| Rescue inhalers |  |  |  |
| SABA | 415 (62.7) | 2,604 (59.6) | 6.3 |
| SABA/SAMA | 278 (42.0) | 1,482 (33.9) | 16.7 |
| SAMA | 128 (19.3) | 686 (15.7) | 9.6 |
| Other exacerbation treatments |  |  |  |
| Antibiotics | 561 (84.7) | 3,596 (82.3) | 6.5 |
| OCS | 390 (58.9) | 2,427 (55.6) | 6.8 |
| Respiratory support |  |  |  |
| Oxygen therapy | 199 (30.1) | 1,071 (24.5) | 12.5 |
| Mechanical ventilation | 25 (3.8) | 194 (4.4) | 3.4 |
| History of COPD/chronic bronchitis exacerbation, n (%) |  |  |  |
| Severe exacerbationb | 310 (46.8) | 1,770 (40.5) | 12.7 |
| Moderate exacerbationc | 320 (48.3) | 1,808 (41.4) | 14.0 |
| Baseline all-cause HRU, n (%) |  |  |  |
| Inpatient visit | 389 (58.8) | 2,448 (56.1) | 5.5 |
| ED visit | 445 (67.2) | 2,829 (64.8) | 5.2 |

**Notes:**

aUse of combination therapy ICS/LABA/LAMA was also assessed but not reported due to occurrence in less than 1% of patients

bDefined as an inpatient admission with COPD or chronic bronchitis diagnosis, not including the index date

cDefined as an emergency department visit with COPD or chronic bronchitis diagnosis or prescription for an oral corticosteroid within 14 days of an office visit with COPD or chronic bronchitis diagnosis, not including the index date

**Abbreviations:** CCI: Charlson Comorbidity Index; COPD: chronic obstructive pulmonary disease; ED: emergency department; HRU: healthcare resource utilization; ICS: inhaled corticosteroids; LABA: long-acting beta agonist; LAMA: long-acting muscarinic antagonist; OCS: oral corticosteroid; SABA: short-acting beta agonist; SAMA: short-acting muscarinic antagonist; SD: standard deviation; TIA: transient ischemic attack
